## RESEARCH ARTICLE

## Metabolic recovery from drowning by insect pupae

H. Arthur Woods\* and Steven J. Lane

## ABSTRACT

Many terrestrial insects live in environments that flood intermittently, and some life stages may spend days underwater without access to oxygen. We tested the hypothesis that terrestrial insects with underground pupae show respiratory adaptations for surviving anoxia and subsequently reestablishing normal patterns of respiration. Pupae of *Manduca sexta* were experimentally immersed in water for between 0 and 13 days. All pupae survived up to 5 days of immersion regardless of whether the water was aerated or anoxic. By contrast, fifth-instar larvae survived a maximum of 4 h of immersion. There were no effects of immersion during the pupal period on adult size and morphology. After immersion, pupae initially emitted large pulses of CO<sub>2</sub>. After a subsequent trough in CO<sub>2</sub> emission, spiracular activity resumed and average levels of CO<sub>2</sub> emission were then elevated for approximately 1 day in the group immersed for 1 day and for at least 2 days in the 3- and 5-day immersion treatments. Although patterns of CO<sub>2</sub> emission were diverse, most pupae went through a period during which they emitted CO<sub>2</sub> in a cyclic pattern with periods of 0.78–2.2 min. These high-frequency cycles are not predicted by the recent models of Förster and Hetz (2010) and Grieshaber and Terblanche (2015), and we suggest several potential ways to reconcile the models with our observations. During immersion, pupae accumulated lactate, which then declined to low levels over 12–48 h. Pupae in the 3- and 5-day immersion groups still had elevated rates of CO<sub>2</sub> emission after 48 h, suggesting that they continued to spend energy on reestablishing homeostasis even after lactate had returned to low levels. Despite their status as terrestrial insects, pupae of *M. sexta* can withstand long periods of immersion and anoxia and can reestablish homeostasis subsequently.

**KEY WORDS:** Immersion, Anoxia, Reperfusion, Oxygen, Lactate, Carbon dioxide, Cyclic ventilation, Discontinuous gas cycles, Spiracle

## INTRODUCTION

Although insects typically are thought of as ‘terrestrial’ or ‘aquatic’, these labels do not capture the biology of some species. Aquatic species, for example, usually have one or more terrestrial stages, most frequently the adult. Other species are terrestrial but spend at least some time in water, either to lay eggs or to feed and grow, or because their ecology makes them prone to intermittent flooding (Adis and Messner, 1997; Hoback and Stanley, 2001). Immersion likely exerts strong selection for the evolution of behaviours, morphologies and physiologies that help insects survive contact

with water and its associated risks of hypoxia or anoxia (Hoback and Stanley, 2001).

One common flood-prone habitat is soil (Cavallaro and Hoback, 2014; Hoback and Stanley, 2001), which can become saturated by snowmelt or rainfall (Hoback et al., 1998) or by overflowing streams and rivers. Many insects spend part or all of their lives in soil (Hoback et al., 1998; Hunter, 2001; Lilly, 1956; Tuttle, 2007; Uvarov, 1977; White and Strehl, 1978). For soil insects, flooding may transport pathogens to the insect or encourage preexisting infections to proliferate. It may alter soil structure so that the insect is trapped (Sprague and Woods, 2015). And it may alter the exchange of respiratory gases. Compared with dry soils, water-logged soils provide less oxygen (Baumgärtl et al., 1994; Hoback and Stanley, 2001), both because water holds much less oxygen per unit volume than does air and because the oxygen it contains moves more slowly by diffusion (Aachib et al., 2004; Denny, 1993; Verberk et al., 2011; Woods, 1999). In addition, soils can support large populations of microbes, whose respiration may depress oxygen locally (Singh and Gupta, 1977).

Anoxia can be highly stressful, and even in anoxia-tolerant individuals it may drive large-scale changes in metabolism and development (Harrison et al., 2006; Hoback and Stanley, 2001; Hochachka, 1997; Yocum and Denlinger, 1994). Negative effects stem mainly from declining production of ATP, which can starve the pumps that maintain ion gradients (Storey and Storey, 1990). Of the resulting changes in ion distributions, calcium entry into cells appears to be the most dangerous (Choi, 2005; Thompson et al., 2006; Van Voorhies, 2009). Other major cellular effects include changes in levels of NADH, ADP, AMP and pH (Weyel and Wegener, 1996). To slow down or prevent these changes, many hypoxia- and anoxia-tolerant species sustain low levels of ATP production by switching over to anaerobic pathways. In insects, common end products from anaerobic metabolism are lactate, succinate and alanine (Hoback and Stanley, 2001). Anaerobic end products can also accumulate in normoxia if demand for oxygen outstrips its supply, as occurs transiently in jumping insects (Kirkton et al., 2005).

Recovery from anoxia poses an additional set of physiological problems (Lighton and Schilman, 2007; Wegener, 1993). The first problem is to reestablish energy and ion homeostasis. This includes reactivating mitochondria to produce ATP aerobically and then using it to power the pumps that generate trans-membrane gradients and the metabolic pathways that rid the body of accumulated organic end products. The second problem is to minimize oxidative damage arising from reperfusion of the tracheal system. In many animals, including insects and humans, reperfusion after ischemia can be more dangerous than ischemia per se, because reperfusion generates reactive oxygen species (ROS) (Boardman et al., 2012; Collard and Gelman, 2001; Doelling et al., 2014; Joannisse and Storey, 1996; Lighton and Schilman, 2007). ROS attack organic components of cells, including proteins, DNA and lipids, and can disrupt cellular functions or kill cells outright. In insects, reperfusion after anoxia can occur rapidly because oxygen is delivered not by a circulatory

Division of Biological Sciences, University of Montana, 32 Campus Drive, Missoula, MT 59812, USA.

\*Author for correspondence (art.woods@mso.umt.edu)

 H.A.W., 0000-0002-3147-516X

Received 1 June 2016; Accepted 28 July 2016

system, but directly, in the air phase, by the tracheal system (Wegener, 1993). Such a respiratory system should make insects prone to oxidative damage, and that damage could alter patterns of respiratory gas exchange (Lighton and Schilman, 2007), disrupt development, modify adult morphologies, reduce performance or lead to death.

Using the moth *Manduca sexta* (Linnaeus 1763), we tested the hypothesis that life stages exposed to immersion (see Fig. 1), even rarely, evolve mechanisms for surviving the respiratory challenges it poses, and for reestablishing respiratory homeostasis once air becomes available again (Hoback and Stanley, 2001). We examined mortality as a function of immersion time in both larvae and pupae, whether pupae accumulate lactate and, once pupae have access to air again, how rapidly lactate levels decline and the process by which patterns of gas exchange are reestablished. Immersion resulted in profound changes in patterns of CO<sub>2</sub> emission in post-immersion pupae, and we discuss the relationships between our results and the spiracle-control models proposed by Förster and Hetz (2010) and Grieshaber and Terblanche (2015). Finally, we examined whether there are long-term effects of immersion on the pupal–adult ecdysis and on adult morphologies.

## MATERIALS AND METHODS

### Animals

*Manduca sexta* has four terrestrial life stages, and it pupates underground. When a larva has finished feeding and growing, it descends at night from its host plant, searches for a suitable pupation site, and digs several centimeters into the ground (Madden and Chamberlin, 1945; Sprague and Woods, 2015), where it excavates a space. Over the subsequent days, the larva (becoming a prepupa) constructs a soil chamber, the main function of which is to provide space for larval–pupal and pupal–adult ecdyses (Sprague and Woods, 2015). For the pupa, an underground lifestyle raises the risk of flooding. The pupal chamber does not exclude water and therefore does not act as a physical gill (see Kolesnikov et al., 2012; Seymour and Matthews, 2013; J. C. Sprague and H.A.W.,

unpublished observations), nor do pupae trap air films on the cuticle as do many semi-aquatic insects (Hutchinson, 1981; Pedersen and Colmer, 2012). In nature, the risk of flooding may be high for pupae because larval host plants often occur in disturbed areas, such as along stream beds. In the grasslands of southeastern Arizona (USA), we have seen wandering larvae descend from their host plants into dry arroyos, the banks of which they were unable to climb, eventually pupating in the arroyo sands. During summer monsoon rains, the arroyos can sustain strong flows and hold persistent pools of standing water (Fig. 1).

We used individuals from a laboratory line (Carolina Biological), which were reared individually on artificial diet (Bell and Joachim, 1976). Larvae were reared in an incubator at  $26.7 \pm 0.5^\circ\text{C}$  and under a 15 h:9 h light:dark photoperiod to prevent pupal diapause (though not entirely successfully; see Results). At the onset of wandering, larvae were placed into 2.54 cm diameter holes drilled in wooden blocks, where they pupated. Larvae were held in blocks for 10 days, after which they were assigned randomly to immersion treatment groups. Prepupae shed their larval cuticles after 3–5 days and the pupal cuticle was hardened by day 6 or 7. *Manduca sexta* for the larval immersion assay were reared in a similar way, but were taken out of the incubator as mid-fifth instars. They weighed an average ( $\pm$ s.e.m.) of  $5.57 \pm 0.33$  g.

### Survival of immersion by pupae and larvae

Pupae ( $5.67 \pm 0.07$  g) were put into one of two immersion treatments or a control treatment. In immersion treatments, 230 ml of tap water was placed into 250 ml plastic cups (Karat, Chino, CA, USA) with lids, and the cups were maintained at  $22.1 \pm 0.1^\circ\text{C}$  in constant darkness. Pupae were immersed individually using 15 cm zip ties gently placed against them, which prevented them from floating to the surface without compressing the cuticle or otherwise restricting movement.

We used two different immersion treatments to account for the possibility that pupae obtain oxygen directly across the cuticle, or across an air–water interface at the spiracles. In an anoxic treatment, oxygen was purged by bubbling nitrogen gas into each cup at  $\sim 30$  ml min<sup>-1</sup> (regulated using a Sable Systems MFC-4, Sable Systems International, Las Vegas, NV, USA). Pupae in this treatment had no access to oxygen by any means (we confirmed that the water was anoxic using a calibrated Clark-style electrode, Unisense). In an aerated treatment group, air was bubbled into each cup to give air-saturated levels of dissolved oxygen. In a control group, pupae were placed into plastic cups with no water, held down with zip ties, and then placed in a similar environment to the two immersion treatments for the duration of the experiment.

From each treatment group, we sampled pupae at 1, 3, 5, 7, 9 and 13 days post-immersion and assessed whether they were alive. A pupa was determined to have survived if it eventually eclosed as an adult. After immersion, pupae were held in  $12.7 \times 7.9 \times 24.9$  cm waxed paper bags (Brown Paper Goods Company, Waukegan, IL, USA) and kept at room temperature (approximately  $21^\circ\text{C}$ ). Starting 2 weeks after the end of immersion, relative humidity was raised in each paper bag by placing a  $20 \times 30$  cm piece of water-soaked paper towel in it. The towel was rewetted daily until eclosion. Humidity was monitored in the paper bags using a HOBO data logger (Onset Computer Corp., Bourne, MA, USA) and averaged 69.4%. Saturated paper towels were placed into the bags of control pupae 2 weeks after the start of the experiment. Bags were checked once per day. Upon eclosion, moths were killed by freezing for 2 h and body mass, body length, thorax width and wing length were measured. Body mass was measured using a PB303 balance

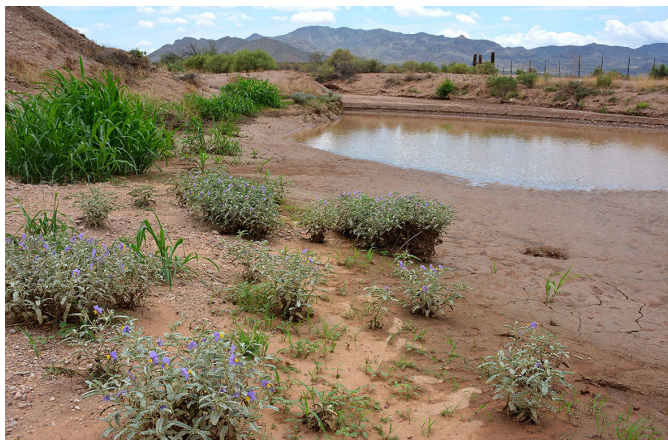

**Fig. 1. Flooded habitat of *Manduca sexta*, 25 July 2013, along Animas Creek in far southwestern New Mexico, USA.** The Chiricahua Mountains (Arizona) are in the background. The flowering plants in the foreground are silverleaf nightshade (*Solanum elaeagnifolium*), which is an occasional host plant of *M. sexta*. Less visible in the background are several of *M. sexta*'s primary host plant in this area, *Datura wrightii*. When larvae have finished feeding and growing, they descend from their host plant and search on the ground for appropriate pupation sites. Often along dry creeks, larvae become trapped in the bottom and pupate there. Intermittent rains during the summer monsoon season can then flood those habitats.

(±0.001 g; Mettler-Toledo, Columbus, OH, USA) and body length, thorax width and wing length were obtained with digital calipers (±0.01 mm; Mitutoyo Corp., Aurora, IL, USA). We also estimated the pupal period for each individual, by recording the number of days between wandering and eclosion.

In a separate experiment, we examined how well larvae survived immersion, as a kind of positive control using a life stage that likely has little evolutionary history with immersion. Different life stages within particular species often have different sensitivities to low oxygen (Hoback and Stanley, 2001). Twenty-eight *M. sexta* were reared to the fifth instar and then were placed individually into 28 ml screw-top glass vials filled with water (Hoback et al., 1998). Larvae were returned to air at 1, 2, 4, 8, 12, 16, 20 and 24 h post immersion, left to dry at room temperature, and were scored as alive if they successfully pupated.

Metabolic recovery from immersion

Using flow-through respirometry (Lighton, 2008), we measured rates of CO<sub>2</sub> emission by pupae at room temperature (21–23°C) from the moment they were removed from immersion through the subsequent 24–48 h. Levels of CO<sub>2</sub> were measured by an LI-7000 CO<sub>2</sub>/H<sub>2</sub>O Analyzer (LI-COR, Lincoln, NE, USA) plumbed in differential mode: air from a cylinder of CO<sub>2</sub>-free compressed air was sent (300 ml min<sup>-1</sup>) first through the reference cell, then looped externally through a metabolic chamber (glass, 110 ml volume), then back through the measurement side of the analyzer. Flow rates were controlled by an MFC-4 (Sable Systems). The analyzer was calibrated frequently with CO<sub>2</sub>-free air (zero) and 2000 ppm CO<sub>2</sub> in nitrogen (span). Data were sampled at 1 Hz, and analog outputs from the analyzer were sent to an A/D converter (UI-2, Sable Systems) and then to a computer running Expedata data logging software (v1.4.8, Sable Systems). For most pupae, we measured baseline values of CO<sub>2</sub> for several minutes at the beginning and at the end of the run, and these were used to correct the analyzer for drift (which generally was very slight).

Pupae 7–11 days post-wandering were immersed in a water-filled plastic cup for 0, 1, 3 or 5 days. Because there was no difference in survival rates of pupae in the two immersion treatments (Table 1), neither air nor nitrogen was bubbled into the water. At the end of the immersion period, pupae were removed from water, blotted briefly and placed into the respirometry system. Day 0 pupae were taken directly out of the wood blocks and put into the metabolic chamber; these pupae were the metabolic controls. Each 0- and 1-day immersion pupa was sampled for 24–48 h, while 3- and 5-day immersion pupae were sampled for 48 h (to account for longer recovery times after immersion). Six pupae (three male, three female) were measured for each immersion time period, one at a time (no multiplexing), for a total of over 1000 h of metabolic data collection.

Accumulation and clearance of lactate

Lactate concentrations were measured using methods similar to those described by Kirkton et al. (2005). After immersion (see below),

pupae were weighed, sexed and frozen at –80°C, then cut in half length-wise to reduce the total mass of tissue going into the assay. Pupal halves were placed in a cold 1:10 dilution of HClO<sub>4</sub> in a 40 ml ground-glass homogenizer on ice and homogenized using a Teflon plunger powered by an 18 V cordless drill (Makita, La Mirada, CA, USA). A subsample (1 ml) of the mixture was centrifuged at 15,850 g for 5 min. Supernatants (750 µl) were removed and diluted with 169 µl of KOH-MOPS and centrifuged again for 1 min. Additional KOH-MOPS was added until pH was approximately neutral, as judged by pH strips (Hydriion Insta-Check pH Paper 6.0–8.0, Micro Essential Laboratory, Brooklyn, NY, USA).

Along with 20 µl of the above lactate solution, 100 µl 2× Tris-Hydrazine buffer with 5 mmol l<sup>-1</sup> oxidized nicotinamide adenine dinucleotide and 3.75% lactate dehydrogenase (LDH) were mixed together in individual wells of a 96-well plate with black sides and a clear bottom (Greiner Bio-One, Monroe, NC, USA). Immediately after adding the LDH, the mixture was shaken for 30 s, and then the lactate solution was analyzed fluorometrically using a SpectraMax M3 spectrometer (Molecular Devices, Sunnyvale, CA, USA) with the following settings: kinetic test, 45 min, 20 s intervals, bottom read with the fluorometer excitation wavelength set to 355 nm and the emission wavelength set to 460 nm. The data were recorded by a computer running SoftMax Pro acquisition software (Molecular Devices). Raw readings were converted to lactate concentrations using a standard curve constructed from dilutions of a 2 mmol l<sup>-1</sup> lactate solution. Standard curves were run on every plate.

Pupae 10–12 days post-wandering were immersed in water-filled plastic cups for 0, 1, 3 or 5 days as described above. To measure the amount of lactate produced during immersion, pupae were removed from the water at the above intervals, blotted briefly and then immediately frozen at –80°C. To measure whether levels of lactate declined after immersion, some individuals were frozen at 12, 24 and 48 h after being removed from water. Day 0, or lactate control, pupae were sampled twice, once immediately after being taken out of the wood blocks and after 48 h. Five pupae were measured for each immersion period and subsequent recovery period, for a total of 70 individuals.

Table 2. ANOVA results for factors affecting pupal period, thorax width, body length, wing length, body mass and lactate concentration in *M. sexta*

|                                               | Variable (d.f.)                     | F      | P        |
|-----------------------------------------------|-------------------------------------|--------|----------|
| Pupal period (days)                           | Treatment (1)                       | 42.361 | 1.90e–06 |
|                                               | Time (2)                            | 8.698  | 1.77e–03 |
|                                               | Treatment×Time (2)                  | 5.567  | 0.012    |
| Thorax width (mm)                             | Treatment (2)                       | 0.032  | 0.968    |
|                                               | Time (2)                            | 0.885  | 0.427    |
|                                               | Treatment×Time (4)                  | 1.631  | 0.202    |
| Body length (mm)                              | Treatment (2)                       | 1.633  | 0.218    |
|                                               | Time (2)                            | 1.113  | 0.346    |
|                                               | Treatment×Time (4)                  | 0.718  | 0.589    |
| Wing length (mm)                              | Treatment (2)                       | 0.920  | 0.413    |
|                                               | Time (2)                            | 0.303  | 0.742    |
|                                               | Treatment×Time (4)                  | 0.820  | 0.527    |
| Body mass (g)                                 | Treatment (2)                       | 0.455  | 0.640    |
|                                               | Time (2)                            | 0.578  | 0.570    |
|                                               | Treatment×Time (4)                  | 0.234  | 0.916    |
| Lactate concentration (mmol l <sup>-1</sup> ) | Days immersed (3)                   | 63.69  | <2e–16   |
|                                               | Hours of emersion (3)               | 72.76  | <2e–16   |
|                                               | Days immersed×Hours of emersion (4) | 18.95  | 1.07e–12 |

Table 1. Summary of survival and death by pupal *Manduca sexta* immersed in water

|         | 1 day | 3 days | 5 days | 7 days | 9 days | 11 days | 13 days |
|---------|-------|--------|--------|--------|--------|---------|---------|
| Aerated |       |        |        |        |        |         |         |
| Alive   | 3     | 4      | 4      | 0      | 0      | 0       | 0       |
| Dead    | 0     | 0      | 0      | 4      | 4      | 4       | 4       |
| Anoxic  |       |        |        |        |        |         |         |
| Alive   | 3     | 4      | 4      | 0      | 0      | 0       | 0       |
| Dead    | 0     | 0      | 0      | 4      | 4      | 4       | 4       |



Statistical analyses

All data were processed and analyzed using scripts written in R v. 3.2.3 (R Foundation for Statistical Computing, Vienna, Austria). Raw metabolic data were read into R using the package SableBase (T. D. Förster, Sable Systems) and then stitched together, corrected for baseline drift and converted into molar rates of CO<sub>2</sub> emission.

We used a two-way ANOVA to test the effects of immersion time and treatment group on adult thorax width, body length, wing length and body mass. The normality of the data was confirmed with an Anderson–Darling test. We also used two-way ANOVA to test the

effects of immersion time and treatment group on pupal period, but here we compared pupal period in the control versus immersion. As we found no difference between the treatment groups for survival or adult morphologies, this inclusion was justified. To test for differences in pupal period, *post hoc* analyses were conducted using Tukey’s test. Fluctuations in the traces of 1–2 h segments of CO<sub>2</sub> emission were analyzed using autocorrelation analysis, from which significant peaks were extracted as estimates of cycling frequency. To analyze the lactate data, we fit a two-way ANOVA to the three experimental groups, with days of immersion and hours of emersion as factors.

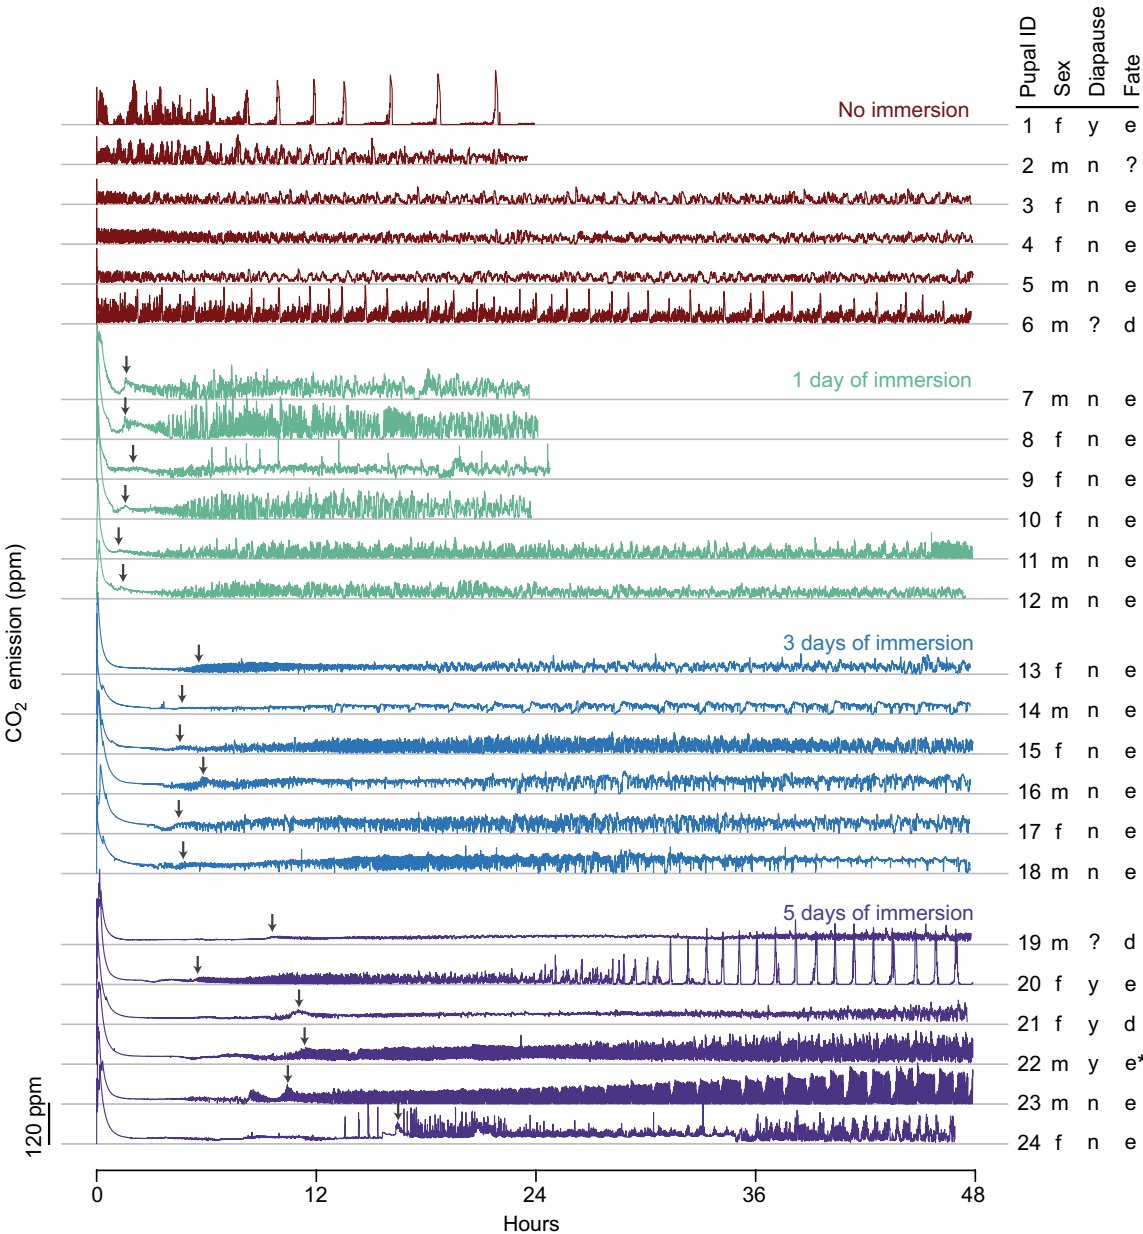

**Fig. 2. Traces of CO<sub>2</sub> emission for *M. sexta* pupae (N=24) in the immersion recovery experiment.** Emission by most pupae was recorded for 48 h, but a subset (N=6) was recorded for just 24 h. The original data were sampled at 1 Hz, but to render this figure, they were subsampled to 0.1 Hz. Gray horizontal lines represent 0 ppm for each pupa, and the gray lines are 120 ppm apart. Vertical arrows represent, for each immersion pupa, the time at which we estimate it starts to resume normal respiratory function, based on the joint occurrence of increased spiracular activity and a relatively sudden rise in average level of CO<sub>2</sub> emission after a stereotypic lull. The right-hand columns contain additional descriptive information: sex (f=female, m=male); diapause status (y=yes, went into diapause, n=no, did not); and fate (e=successfully eclosed as an adult, d=died during pupation, e\*=died during eclosion). Question marks represent missing data.

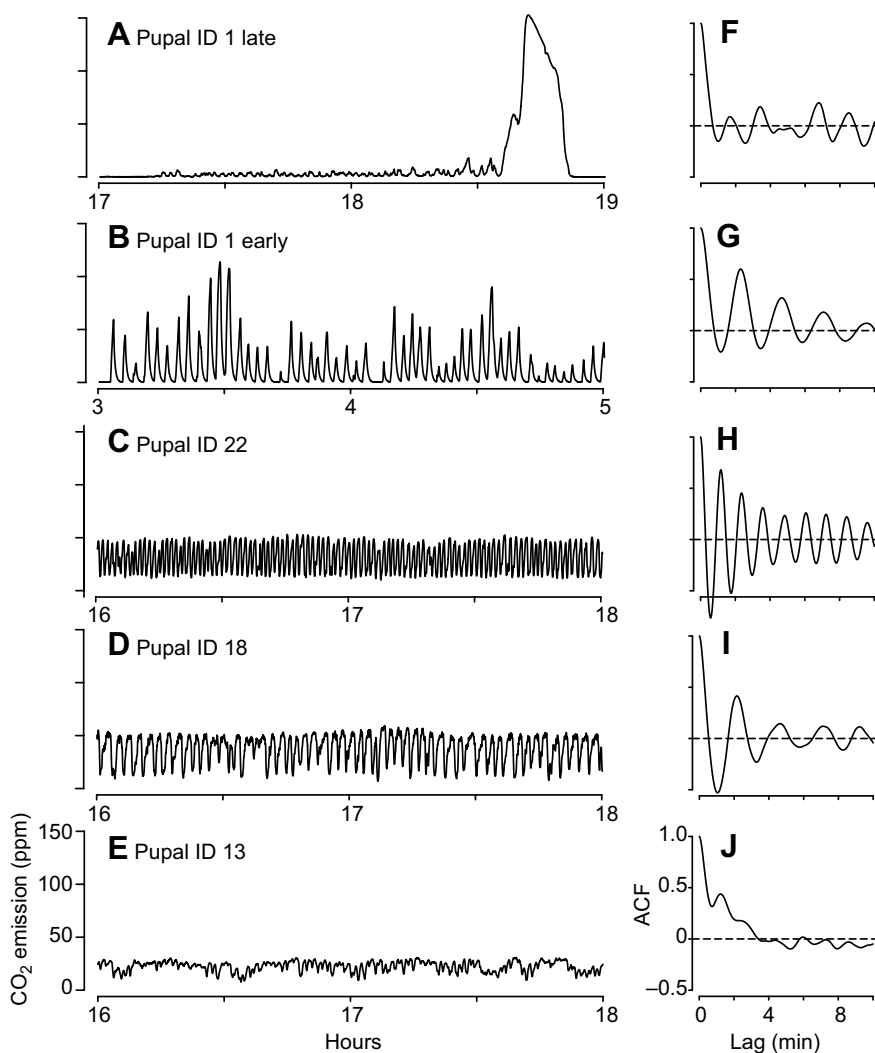

**Fig. 3. Diversity of cyclic patterns of CO<sub>2</sub> emission and associated autocorrelation functions in *M. sexta*.** (A) A control pupa (ID 1) that showed discontinuous gas-exchange cycles (DGC) starting approximately 5 h after being placed in the respirometry chamber (see Fig. 2). The associated autocorrelation function applies only to the flutter phase, between 17.3 and 18.3 h. (B) Pupa 1 in hours 3–5, during which it showed cyclic ventilation. (C) Pupa 22 from the 5-day immersion group, showing highly regular cycles of CO<sub>2</sub> emission. (D) Pupa 18 from the 3-day immersion group, showing regular cycles of CO<sub>2</sub> emission in which emissions are mostly high but are punctuated by ‘anti-bursts’ of low CO<sub>2</sub> emission. (E) Pupa 13 from the 3-day immersion group, showing an extreme version of the pattern from D. Associated autocorrelation functions are shown in F–J.

Data have been deposited into the Dryad Digital Repository (<http://dx.doi.org/10.5061/dryad.v7fd5>; Woods and Lane, 2016).

## RESULTS

### Survival of immersion by pupae and larvae

At 21°C, all pupae survived up to 5 days of immersion, but none survived 7 days or more; there was no difference between gas treatment groups (Table 1). Control pupae all survived ( $N=80$ ). Because there was no variation within time points, these results could not be modeled by logistic regression; the best estimate of the  $LT_{50}$  (median lethal time) is simply the midpoint between survival and death, which is 6 days. By comparison, fifth-instar larvae of *M. sexta* survived immersions of up to 4 h but no longer ( $N=28$ ; data not shown). Several larvae immersed for longer initially reestablished body turgor and resumed moving, but then died within 24 h.

### Duration of the pupal period and adult morphologies as a function of immersion time

Pupal duration was affected by immersion time and treatment, and there was an interaction between them (Table 2). Immersed pupae took 6 days longer to eclose than those not immersed (Fig. S1). Within the immersion treatments, those immersed for 1 day did not eclose any later than those in the control group, but pupae immersed for 3 or 5 days took almost 7 days longer to eclose compared with

the controls. There was, however, no difference in pupal period between those immersed for 3 or 5 days (Fig. S1).

There was no effect of immersion time or treatment group (anoxic or aerated) on any of the measured adult morphologies: body mass, body length, thorax width or wing length (Table 2, Fig. S2).

### Metabolic recovery from immersion

Pupae in the control group (no immersion,  $N=6$ ) showed more high-frequency fluctuations in CO<sub>2</sub> emission at the beginning of their metabolic traces than at the end (Fig. 2). These results suggested that even brief handling (<2 min) was enough to disturb them for many hours. We analyzed this effect in more detail (Fig. S3), showing that for five of six pupae, disturbed patterns of respiration persisted for 5–10 h after handling. After 10 h, patterns of emission became more consistent: four of the pupae showed slow, irregular shifts between very low and intermediate levels of CO<sub>2</sub> emission. One pupa (ID 1) clearly also exhibited discontinuous gas-exchange cycles (DGC), and this pupa turned out to have gone into diapause, despite our having set the larval light cycle with day lengths putatively long enough to prevent this. Diapause was diagnosed from very long times to eclosion. Most pupae (non-diapausing) eclosed approximately 1 month after wandering (mean 35 days, range 33–66 days). The four pupae (Fig. 2) identified as diapausing eclosed after 120–207 days. One other pupa (ID 6) continued to show high-

frequency fluctuations, with superimposed DGC-like spikes, for the entire 48 h of measurement.

All pupae in the experimental groups showed similar patterns of metabolic recovery, with differences arising from the timing of events (Fig. 2). All pupae initially emitted large spikes of  $\text{CO}_2$ , which peaked within 5–10 min and then fell rapidly. The absolute peak level of emissions did not vary strongly as a function of immersion time (Fig. 2, Fig. S4). During this time, changes in  $\text{CO}_2$  emission were smoothly graded. In eight of 12 pupae in the 3- and 5-day immersion groups there was an additional pulse of  $\text{CO}_2$  emitted between 20 and 30 min post-emersion (arrows in Fig. S4).

Regular cycles of  $\text{CO}_2$  emission commenced around 2 h in the 1-day immersion group, and the amplitude of cycling increased rapidly, reaching high levels by 4–6 h post-emersion (Fig. 2). In pupae immersed for 3 days, cycling began 3–4 h post-emersion, and the amplitude of cycling increased slowly through ~12 h; in general, cycling amplitude in the 3-day group never reached the level seen in the 1-day group. In pupae immersed for 5 days, cycling began 4–10 h post-emersion, and, for some pupae, cycling amplitude continued to increase throughout the 2-day measurement period. Besides the onset of cycling, there was, for most pupae, a distinct decrease and then increase in metabolic rate either associated directly with cycling or occurring several hours afterward (arrows in Fig. 2).

Most pupae in both control and experimental groups showed distinct high-frequency cycling of  $\text{CO}_2$  emission for several hours during recovery, and some from the longer immersion groups showed the pattern for the entire trace after cycling commenced. Cycles occurred on two time scales. Seventeen of 24 pupae showed high-frequency cycling, with peaks of  $\text{CO}_2$  emission having a mean period of 1.56 min (range 0.78–2.17 min; Fig. 3A–E), and 13 of 24 showed lower-frequency cycling, with a mean period of 12.4 min (range 6.5–31 min; data not shown). The total sample size is greater than 24 because some pupae showed both cycling frequencies simultaneously. Periods were found by examining the timing of major peaks in the autocorrelation function with lags of 0–10 min (Fig. 3F–J) or longer. We saw at least three discernible variants of high-frequency cycling. Some pupae, especially those in the control group, emitted  $\text{CO}_2$  at low levels with regular, brief pulses (Fig. 3B). Others had rates that cycled symmetrically between high and low without going all the way to zero (Fig. 3C); these were primarily from the 5-day immersion group. And a third group had continuous, high levels of emission, with brief drops (Fig. 3D,E); these were primarily from the 3-day immersion group. Two of the pupae (Fig. 2, pupal IDs 1 and 20) showed clear patterns of DGC. Only the first pupa, however, had distinct fluttering preceding the long open phase (Fig. 3A), and the fluttering period in this individual was 1.67 min. There thus appears to be a common high-frequency oscillation in rates of  $\text{CO}_2$  emission with a period of 1–2 min.

Even after the onset of cycling, metabolic traces differed among treatment groups. Patterns from the 1-day group were largely stationary starting approximately 10 h after emersion. However, those traces still did not resemble those of the control group: the 1-day pupae had more high-frequency fluctuations for the rest of their measurement periods. Pupae in the 3-day group mostly had very high-frequency fluctuations between 12 and 24 h post-emersion, with longer frequencies dominating after 24 h. Pupae from the 5-day group mostly had very high-frequency fluctuations through their 48-h measurement periods, and their traces were the least stationary.

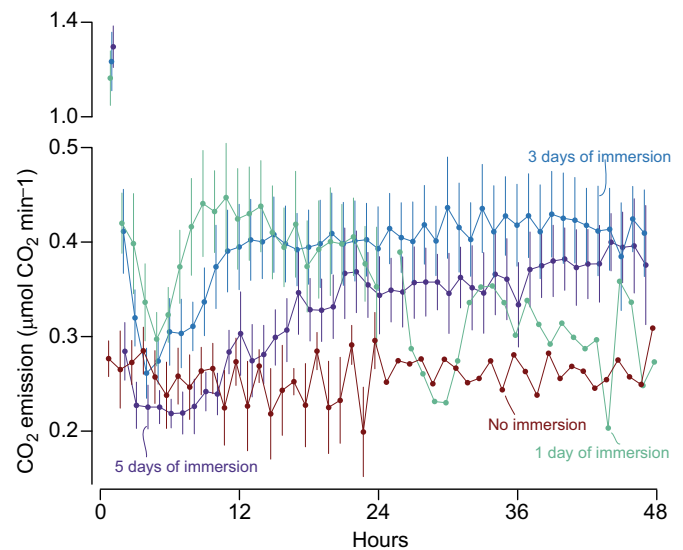

**Fig. 4. Hourly averages of  $\text{CO}_2$  emission by *M. sexta* pupae.** Bars are standard errors ( $N=6$  per point). Points are offset slightly in the x direction to reduce overlap. There are no error bars after 24 h for control pupae (brown) or those that were immersed for 1 day (light green) because there were fewer than six pupae at those time points (four and two, respectively).

Finally, there were consistent differences among groups in average metabolic rate across time after emersion (Fig. 4). Pupae from the no-immersion group had low metabolic rates ( $0.2\text{--}0.3\ \mu\text{mol CO}_2\ \text{min}^{-1}$ ). Average emission rates for immersion groups depended on length of immersion. After the first hour (which had very high average rates of  $\text{CO}_2$  emission associated with the initial spike; see Fig. 2), pupae showed a 50–75% increase in metabolic rate, with the peak reached at different times: 1-day pupae reached that peak by 10–12 h post-emersion, 3-day pupae showed it from 18 to 48 h, and 5-day pupae gradually rose to that level by the end of the 48-h trace. Presumably, pupae from the 3- and 5-day immersion groups would have exhibited declining rates of  $\text{CO}_2$  emission after 2 days had we continued our measurements.

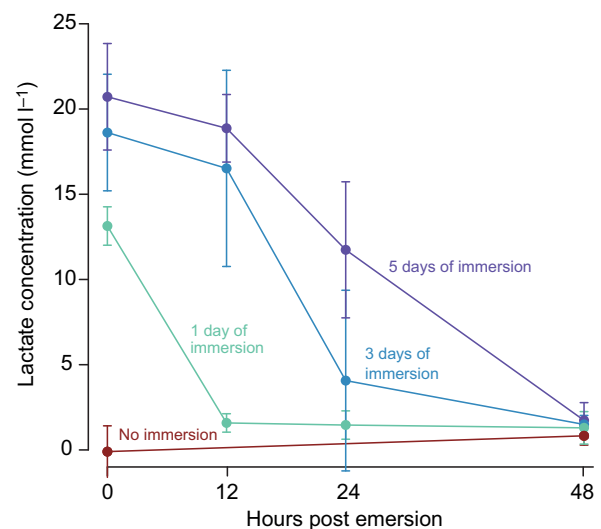

**Fig. 5. Lactate concentrations in *M. sexta* pupae after 1, 3 or 5 days of immersion in water at room temperature, and in control pupae that were not immersed.** Five pupae were assayed in each treatment at each time point ( $N=70$  total). Bars represent  $\pm$ s.e.m.

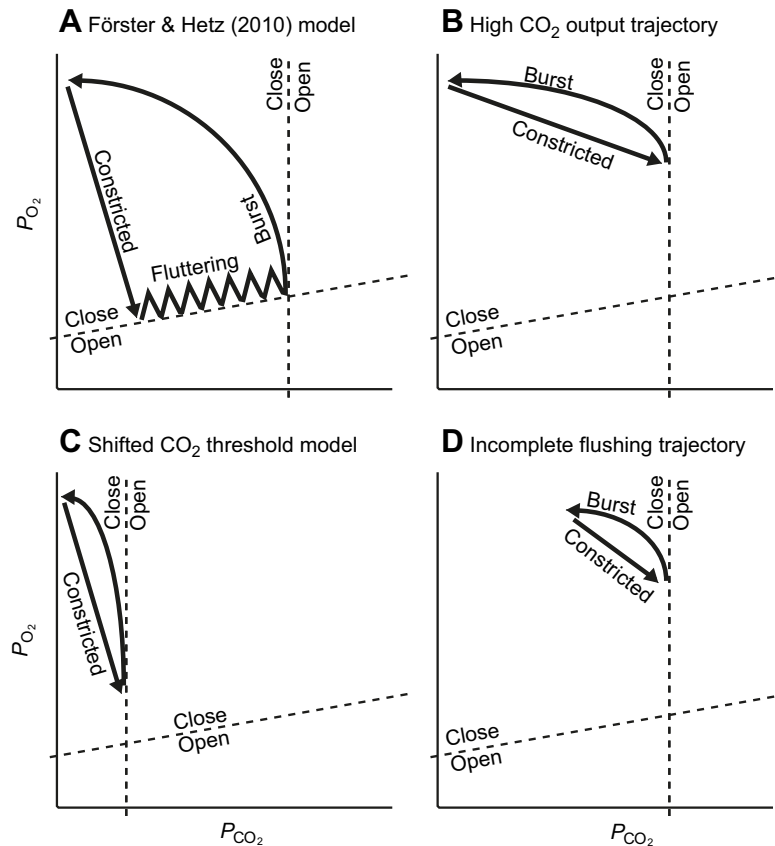

**Fig. 6. Phase-space models of spiracular control.** (A) The model of discontinuous gas-exchange cycles (DGC) proposed by Förster and Hetz (2010), which invokes two thresholds for spiracle opening, one at low tracheal partial pressure of  $O_2$  ( $P_{O_2}$ ) and another at high partial pressure of  $CO_2$  ( $P_{CO_2}$ ). When the spiracles are closed (constricted), tracheal  $P_{O_2}$  falls and  $P_{CO_2}$  rises until  $P_{O_2}$  eventually falls below the  $O_2$  threshold. At that point, the spiracles start to flutter, which allows in small amounts of  $O_2$  while not allowing out equal amounts of  $CO_2$ .  $P_{CO_2}$  thus rises and eventually exceeds the  $CO_2$  threshold, at which point the spiracles open wide (burst) for a longer time, allowing the accumulated internal  $CO_2$  to be emitted. (B) Alternative trajectory in which pupae recovering from immersion have accumulated large stores of  $CO_2$  (Harrison et al., 1995), such that the rate at which  $CO_2$  appears in the tracheal system is much higher than the rate at which  $O_2$  disappears. If so, the slope in phase space will be shallow when the spiracles are closed, such that it strikes the  $P_{CO_2}$  threshold before the tracheal  $P_{O_2}$  falls low enough to strike the  $P_{O_2}$  threshold. A related possibility is that post-immersion pupae had less capacity to store  $CO_2$  in the hemolymph, e.g. if tissues and hemolymph were acidified from other sources, such as lactic acid (Fig. 5), which would drive the  $CO_2$ ↔bicarbonate equilibrium toward  $CO_2$ . Such an effect also could arise if immersion or anoxia reduces levels of nonbicarbonate buffers in the hemolymph (Harrison, 2001). Like the first scenario above, these processes would cause  $CO_2$  to appear in the tracheal system at high rates, leading also to shallow slopes in phase space. The counterargument is that even control pupae showed cycling after they were handled, and they would not have accumulated  $CO_2$ . In addition, the pupae that continued to show cycling for much of the 2-day measurement period (3- and 5-day immersion groups) were unlikely to have retained high levels of internal  $CO_2$  for such a long time. (C) A second alternative model in which the dynamics of tracheal  $P_{O_2}$  and  $P_{CO_2}$  are normal but the  $CO_2$  threshold is lowered, perhaps by stressors of any kind or by lactic acid (Wigglesworth, 1935). (D) Another alternative in phase space, in which the  $CO_2$  unloading from the tissues and hemolymph is so rapid, and the cycles so short, that  $P_{CO_2}$  remains high in the tracheal system throughout the entire cycle. Distinguishing among these alternatives will require additional experiments.

### Accumulation and clearance of lactate

Initial levels of lactate were lowest in control pupae and progressively higher in pupae that had been immersed for longer durations (Fig. 5, Table 2). Lactate levels fell rapidly in pupae with just 1 day of immersion, approaching zero at the next sampled time point (12 h). Levels fell more slowly in pupae immersed for 3 or 5 days, but all groups reached levels indistinguishable from those of the controls by 48 h. Given that the data appeared somewhat sigmoidal, we attempted to fit a three-parameter sigmoid equation to individual immersion groups (1, 3 and 5 days); however, the non-linear fitting routine (nls function in R) failed to converge in some cases. As an alternative, we fit a two-way ANOVA to the three experimental groups, with days of immersion and hours of emersion as factors. The fit is summarized in Table 2 and it confirms the patterns observed in the figure: both factors and their interaction were highly significant.

### DISCUSSION

#### Survival of immersion

Although *M. sexta* is ostensibly terrestrial, pupae but not larvae are able to withstand immersion in water for 5 days. This pupal physiology probably reflects the evolutionary outcome of infrequent but dangerous events in which heavy rains saturate soils locally or cause streams and rivers to flood and produce persistent standing water (see Fig. 1). In our experiments,  $O_2$  levels in the surrounding water did not affect survival rates, indicating that pupae did not absorb  $O_2$  across their cuticles or spiracles or exchange gases via cryptic cuticular air films (Pedersen and Colmer, 2012). Rather, immersed pupae accumulated high levels of lactate, indicating that they relied on anaerobic metabolism; we have no information on other possible anaerobic end products. Although we did not explore its effects directly, temperature probably plays an important role in setting survival times (Hoback et al., 1998; Hutchinson, 1981;



Kolesnikov et al., 2012; Topp and Ring, 1988). Pupae were immersed at 22°C, which is a typical nighttime soil temperature at 8 cm depth at our main field site in southeastern Arizona (Sprague and Woods, 2015). By contrast, pupae in diapause over the winter have lower metabolic demand (Hahn and Denlinger, 2007) and experience lower temperatures, which likely extends survival times (Kolesnikov et al., 2012; Topp and Ring, 1988).

Across life stages, differential tolerance of anoxia is common (Cavallaro and Hoback, 2014; Hoback and Stanley, 2001), and *M. sexta* is no exception. In our experiments, pupae survived longer (up to 5 days) than did larvae (no longer than 4 h). Besides being more prone to flooding than larvae, pupae also had substantially lower mass-specific metabolic rates, which should promote anoxia tolerance (Hoback and Stanley, 2001). In our study (see also Odell, 1998), non-immersed pupae had rates of CO<sub>2</sub> emission in the range of 3.0–3.4  $\mu\text{mol g}^{-1} \text{h}^{-1}$  (see Fig. 3), which were an order of magnitude lower than those of fifth-instar larvae (30–50  $\mu\text{mol g}^{-1} \text{h}^{-1}$ ; Greenlee and Harrison, 2005). In several cases, emerged larvae regained turgor and the ability to move, but then died within 24 h, suggesting that they sustained significant damage as a result of prolonged anoxia or reperfusion (Lighton and Schilman, 2007). Though not studied here, eggs and adults appear to have intermediate tolerance to anoxia (Wegener and Moratzky, 1995; Woods and Hill, 2004). Thus, larvae are the most sensitive to anoxia, pupae the least sensitive, and eggs and adults somewhere in between. This pattern contrasts with the scheme proposed by Hoback and Stanley (2001), in which eggs and adults are thought to be the most sensitive. We propose that the life stage most likely to experience immersion will be the least sensitive to hypoxia and anoxia.

Compared with other species, survival times of pupal *M. sexta* in immersion (anoxia) are impressive but not unprecedented. Larvae of the tiger beetle *Cicindela togata*, which frequently are flooded in nature, survived over 4 days in pure N<sub>2</sub>, whereas larvae of a related species (*Amblycheila cylindriciformis*), which are not flooded, survived less than 1.5 days (Hoback et al., 1998, 2000). Pupae and pharate adults of the bruchid beetle *Callosobruchus subinnotatus*, which live inside bambarra (*Vigna subterranea*) seeds and may be exposed naturally to hypoxia, survived more than 4 days in atmospheres containing only 1% O<sub>2</sub> (Mbata et al., 2000). Some alpine insects held at cold temperatures can survive anoxia for more than 100 days (Conradi-Larsen and Sømme, 1973; Meidell, 1983).

Using immersion rather than pure N<sub>2</sub> complicates the interpretation because immersed insects sometimes obtain O<sub>2</sub> from the surrounding water. Indeed, we suspect that immersed pupae opened their spiracles from the accumulation of internal CO<sub>2</sub> or changes in body pH (see below), and that water was prevented from entering the tracheal system by the small diameters of the openings and highly hydrophobic cuticle. If so, there would have been a small total area (the summed area of all spiracles) of air–water interface across which gases could in principle move. However, our experiments suggest that such an exchange was negligible, as pupal *M. sexta* did not survive immersion differentially between aerated and N<sub>2</sub>-purged water. Other species may use physical mechanisms to obtain oxygen. For example, adults of several species of floodplain ground beetles (Carabidae) can survive 10 days of immersion in cold water using air trapped under their elytra as a physical gill (Kolesnikov et al., 2012; see also Adis and Messner, 1997). We suggest that anaerobic processes are useful over short periods of time (days) but that survival for longer times requires either very cold temperatures or mechanisms for extracting oxygen from water.

### Metabolic recovery from immersion

Pupae showed stereotyped patterns of recovery during the first few hours (Fig. 2, Fig. S4) after emersion: a large initial spike of CO<sub>2</sub> emission without superimposed spikes indicative of spiracular opening and closing, probably because pupae were anaesthetized by accumulated CO<sub>2</sub> or low pH (Badre et al., 2005); a secondary, smaller peak in some immersed individuals (see arrows in Fig. S4), the cause of which is unknown but may reflect reconnection of a significant body compartment to the tracheal system (perhaps blocked by liquid prior to this point) or sudden reactivation of aerobic metabolism in some portion of the pupa (for comparison, see fig. 1 in Lighton and Schilman, 2007); followed by depressed rates of CO<sub>2</sub> emission and, finally, elevated rates of CO<sub>2</sub> emission (Fig. 4). The relative timing of these events was stretched out for pupae immersed longer. Pupae immersed 1 day recovered normal levels of lactate (near zero) and patterns of CO<sub>2</sub> emission by approximately 1 day later, whereas those immersed 3 or 5 days had low levels of lactate by the end of 2 days, but even then still had elevated rates of CO<sub>2</sub> emissions and altered patterns of respiratory exchange.

These data indicate that: (1) immersed pupae use anaerobic respiration; (2) early in recovery, pupae either lack control over spiracles or are forced by high internal levels of CO<sub>2</sub> or acidification of the hemolymph to open them continuously (Badre et al., 2005; Colinet and Renault, 2012; Förster and Hetz, 2010; Harrison, 2001; Hoyle, 1960; Matthews and White, 2011; Nicolas and Sillans, 1989); (3) recovery from immersion is an extended process, requiring at least several days and possibly longer, depending on duration of immersion; and (4) just removing the accumulated lactate is not enough to effect complete recovery. The long period of metabolic recovery is reminiscent of the long-term changes observed in some insects after CO<sub>2</sub> anesthesia (Colinet and Renault, 2012).

### Patterns of respiratory exchange

Immersion had diverse effects on patterns of CO<sub>2</sub> emission. The most striking pattern was the high-frequency cycles of continuous CO<sub>2</sub> emission shown by the majority of post-immersion pupae (12 of 18). We use the term ‘cycling’ to mean something different from the ‘cyclic ventilation’ described by Contreras and Bradley (Contreras and Bradley, 2009, 2010; Contreras et al., 2014): in their descriptions, cyclic ventilation involves brief but complete closure of the spiracles with regular peaks of emission between – essentially shortened DGC with very short inter-burst intervals and no fluttering phase. If the spiracles do not close all the way, they call this a ‘continuous’ respiratory pattern. However, even their continuous patterns can show regular peaks of emission (see fig. 1 in Contreras et al., 2014). Here we use the term cycling to describe more broadly any rhythmic emission that is not DGC.

During high-frequency cycling, pupae emitted peaks of CO<sub>2</sub> separated by 0.78–2.2 min. Five of six control pupae also showed similar periods (Fig. 3, Figs S3, S4) soon after being put in the respirometry system. Control pupae were handled briefly (< a few minutes), suggesting that pupae transition into this pattern in response to multiple stressors. The least disturbed patterns were shown by the control pupae after 12 h (Fig. S4, upper right panel). Their emissions showed no rhythmicity and fluctuated in a kind of random walk. This may indicate asynchronous action of pairs of spiracles in response to local conditions in each segment (T. D. Förster, Spiracular control in moth pupae, PhD thesis, Humboldt University of Berlin, Germany, 2010; Förster and Hetz, 2010), such that only occasionally did all spiracles close simultaneously.



What underlying mechanisms drive cyclic emission of CO<sub>2</sub>? The likeliest candidates are (1) cyclic opening and closing of one or more spiracles or (2) a combination of spiracle cycling and pressure-driven ventilation of the tracheal system. Spiracles are under dual control by local, intra-segmental levels of O<sub>2</sub> and CO<sub>2</sub>. Low O<sub>2</sub> in the ganglion signals the spiracle to open (Burkett and Schneiderman, 1974; Förster and Hetz, 2010). By contrast, high CO<sub>2</sub> affects the spiracle muscle directly (Case, 1956), either by interfering with the transmission of action potentials at the neuromuscular junction (Badre et al., 2005; Hoyle, 1960), or by diffusing into muscle cells and disturbing local pH (Förster and Hetz, 2010; Grieshaber and Terblanche, 2015; Heinrich and Bradley, 2014). Wigglesworth (1935) showed that fleas perfused with high levels of lactic acid exhibited high-frequency (5–15 oscillations per minute) fluctuations in some spiracles. This suggests that high concentrations of lactic acid accumulated by pupae of *M. sexta* (Fig. 5) influenced spiracle cycling.

How many spiracles oscillated in pupae? Although control is local, local conditions are coupled by longitudinal transport of gases and hemolymph. Such systems of coupled oscillators can give complex patterns of control depending on the sensitivity of individual segments to O<sub>2</sub> and CO<sub>2</sub> and the strength of coupling among segments. A model of this process suggested that, with increasing coupling strength, fewer spiracles should cycle between open and closed (T. D. Förster, Spiracular control in moth pupae, PhD thesis, Humboldt University of Berlin, Germany, 2010). Interestingly, Sláma (1988) may have observed this outcome in diapausing pupae of Lepidoptera, including *M. sexta*. Using an anemometric technique to record convective flows across multiple spiracles simultaneously, he showed that a diapausing pupa of *M. sexta* used only a single spiracle for all gas exchange. Moreover, the inter-burst period was approximately 2 min, similar to the periods we observed.

These observations suggest a sequence of spiracular states in post-emersion pupae. In the first hours, high internal CO<sub>2</sub> and/or low pH forced all spiracles open, during which time CO<sub>2</sub> washed out at high rates. Eventually, CO<sub>2</sub> levels fell enough, or pH rose enough, that spiracles began to close locally. And ultimately, all but one or a few spiracles closed, and those last spiracles then began to cycle in response to local O<sub>2</sub> and CO<sub>2</sub> levels in their segments.

A second mechanism that can drive cyclic emission of CO<sub>2</sub> is convective ventilation. Pupae of many species ventilate their tracheae using pulsations of pressure in the hemocoel, originating as abdominal contractions (Sláma, 1999). Changes in hemolymph pressure drive convective flow into and out of the spiracles (Greenlee et al., 2013; Harrison et al., 2013; Matthews and White, 2011; Sláma, 1988, 1999; Westneat et al., 2003), and contractions and spiracular openings can be coordinated to give unidirectional flow (Sláma, 1999). Pupae in our experiments may have used such a strategy, although confirming this would require additional work.

### Challenges to models of spiracle control

A longstanding problem in insect respiratory biology has been to explain the mechanisms that underlie DGC (Burkett and Schneiderman, 1967; Förster and Hetz, 2010; Grieshaber and Terblanche, 2015; Hetz and Bradley, 2005; Lighton, 1996). DGC has three phases: a closed phase, in which the spiracles are sealed shut and no gases exchanged; a flutter phase, in which the spiracles open briefly, letting in small amounts of O<sub>2</sub> and possibly letting out CO<sub>2</sub> (Hetz and Bradley, 2005; Wobschall and Hetz, 2004); and an open phase, in which the spiracles open for many minutes, during which time O<sub>2</sub> levels in the tracheal system rapidly approach

ambient and large amounts of CO<sub>2</sub> are emitted. Two pupae in our study showed DGC (Fig. 2) and others showed possible DGC superimposed on other patterns. Two models of DGC have recently been proposed – the first by Förster and Hetz (T. D. Förster, Spiracular control in moth pupae, PhD thesis, Humboldt University of Berlin, Germany, 2010; Förster and Hetz, 2010), and the second, derived from the first, by Grieshaber and Terblanche (2015). These models have two goals: to reproduce DGCs having characteristics that match observed DGCs reasonably well, and to reproduce the observed effects of changes in temperature, metabolic rate and external gas concentrations on DGC.

The Förster and Hetz model proposes that DGCs emerge from interactions between thresholds for O<sub>2</sub> and for CO<sub>2</sub> (see also Chown and Holter, 2000). When spiracles close, tracheal partial pressure of O<sub>2</sub> ( $P_{O_2}$ ) is high and partial pressure of CO<sub>2</sub> ( $P_{CO_2}$ ) is low. Because the system is sealed, the insect's metabolism draws down  $P_{O_2}$  and raises  $P_{CO_2}$ . Even though aerobic metabolism produces essentially one molecule of CO<sub>2</sub> per O<sub>2</sub> consumed, tracheal  $P_{O_2}$  falls faster than  $P_{CO_2}$  rises because much of the CO<sub>2</sub> dissolves into tissues and hemolymph. Once tracheal  $P_{O_2}$  falls to its threshold, the spiracles start to flutter, opening briefly to let in O<sub>2</sub>. Fluttering frequency may be altered to regulate  $P_{O_2}$  to a relatively constant, low level in the tracheal system (Contreras and Bradley, 2009; Förster and Hetz, 2010; Hetz and Bradley, 2005). Fluttering can also let out CO<sub>2</sub>, depending on whether there is suction ventilation across the spiracles (Kestler, 1985; Sláma, 1988; Wobschall and Hetz, 2004). Either way, CO<sub>2</sub> continues to accumulate, at some point reaching the CO<sub>2</sub> threshold and triggering the spiracles to open for an extended duration. In its original form (Förster and Hetz, 2010), this model may adequately describe the DGCs observed in two of the pupae in our experiments. However, the model cannot explain the high-frequency cycling observed in most other pupae. The default set of parameters examined gave inter-burst periods of approximately 10 min. In a sensitivity analysis, essentially all reasonable sets of parameter values gave cycle times of 10 min or longer. The remaining panels in Fig. 6 graphically summarize potential additional modifications to thresholds and trajectories in phase space that may account for high-frequency cycling.

In an extension of Förster and Hetz's model, Grieshaber and Terblanche (2015) examined additional details of the two-threshold approach, focusing on CO<sub>2</sub>/pH triggers for spiracular opening and closing. The model was parameterized using data from Orthoptera. The authors examined four trigger (threshold) scenarios (TS1–TS4) that invoke single or double triggers and different physiologically realistic mechanisms. A sensitivity analysis revealed a suite of potential patterns of opening and closing, including full DGC (TS2–TS4) with the right timing of each phase. With respect to the high-frequency fluctuations we observed, their most interesting trigger system was TS1. It failed to produce DGC under all combinations of parameters examined, suggesting that it does not capture some essential aspect. Nevertheless, it was the only system that produced short open phases, some of them <1 min long with intervening closed phases lasting >10 min. Perhaps with additional rapid efflux of stored CO<sub>2</sub> from tissues into the tracheal system, such a model could produce cycles with periods of ~1 min.

These models significantly advance our understanding of spiracular behavior. Neither model, however, produced cycles short enough to account for our *M. sexta* data, and the version of Grieshaber and Terblanche's model that comes closest otherwise fails to generate DGC. We therefore still await a future model that captures the full range of observed patterns.

## No long-term effects of pupal anoxia on adult morphology

The danger from immersion can arise from anoxia per se, or from oxidative damage from the ROS produced during reperfusion of the tracheal system (Joanisse and Storey, 1996; Lighton and Schilman, 2007). Either could explain the death of pupae immersed for 7 days or more. However, adults eclosing from pupae that had been immersed 5 days or less had no trouble escaping from the pupal cuticle and expanding their wings, and they showed no other external abnormalities (Fig. S2). There could have been internal or biochemical abnormalities that we missed. These results suggest that surviving pupae suffered no other long-term effects from anoxia or reperfusion.

## Conclusions

Pupae of *M. sexta* survived up to 5 days of immersion in water by using anaerobic respiration. During recovery, they emitted large quantities of CO<sub>2</sub>, showed diverse patterns of cyclic emission of CO<sub>2</sub> and rapidly catabolized accumulated lactate. Immersed pupae did not metamorphose into abnormal adults, but those subjected to longer periods of immersion showed long-term changes in patterns of CO<sub>2</sub> emission during recovery. Among life stages, pupae were the most tolerant of immersion, probably reflecting their evolutionary history of occasional immersion. These findings suggest that pupae of *M. sexta* would make a good model system for further studies linking immersion, anoxia tolerance and the mechanisms underlying patterns of gas exchange in insects. Lastly, the high-frequency cycles of CO<sub>2</sub> emission pose an interesting challenge to current models of spiracular control. Future models should examine spiracular behavior under the conditions of high CO<sub>2</sub> production (from dissolved gases and bicarbonate) coupled with relatively low O<sub>2</sub> consumption.

## Acknowledgements

Thanks to Thomas Förster for sending his R package SableBase (Sable Systems), which we used to read Expedata files into R. Thanks also to Scott Kirkton, Chelle Tervilliger, Harmen Steele and Sandy Ross for advice on and support for the lactate assays, and to Keaton Wilson for rearing some of the insects we used. Thomas Förster and Scott Kirkton provided valuable comments on earlier drafts of the manuscript. We also thank two anonymous reviewers for constructive comments on the first submission.

## Competing interests

The authors declare no competing or financial interests.

## Author contributions

H.A.W. and S.J.L. designed the experiments, and S.J.L. carried them out. H.A.W. and S.J.L. analyzed the results, and H.A.W. wrote the manuscript.

## Funding

This work was supported in part by a grant from the National Science Foundation (IOS 0844916 to H.A.W.).

## Data availability

Data are available from the Dryad Digital Repository (<http://dx.doi.org/10.5061/dryad.v7fd5>).

## Supplementary information

Supplementary information available online at <http://jeb.biologists.org/lookup/doi/10.1242/jeb.144105.supplemental>

## References

- Aachib, M., Mbonimpa, M. and Aubertin, M. (2004). Measurement and prediction of the oxygen diffusion coefficient in unsaturated media, with applications to soil covers. *Water Air Soil Pollut.* **156**, 163–193.
- Adis, J. and Messner, B. (1997). Adaptations to life under water: tiger beetles and millipedes. In *The Central Amazon Floodplain*, (ed. W. J. Junk), pp. 319–330. Berlin: Springer.
- Badre, N. H., Martin, M. E. and Cooper, R. L. (2005). The physiological and behavioral effects of carbon dioxide on *Drosophila melanogaster* larvae. *Comp. Biochem. Physiol. A Mol. Integr. Physiol.* **140**, 363–376.
- Baumgärtl, H., Kritzler, K., Zimelka, W. and Zinkler, D. (1994). Local PO<sub>2</sub> measurements in the environment of submerged soil microarthropods. *Acta Oecol.* **15**, 781–789.
- Bell, R. A. and Joachim, F. G. (1976). Techniques for rearing laboratory colonies of tobacco hornworms and pink bollworms. *Ann. Entomol. Soc. Am.* **69**, 365–373.
- Boardman, L., Terblanche, J. S., Hetz, S. K., Marais, E. and Chown, S. L. (2012). Reactive oxygen species production and discontinuous gas exchange in insects. *Proc. R. Soc. B Biol. Sci.* **279**, 893–901.
- Burkett, B. N. and Schneiderman, H. A. (1967). Control of spiracles in silk moths by oxygen and carbon dioxide. *Science* **156**, 1604–1606.
- Burkett, B. N. and Schneiderman, H. A. (1974). Roles of oxygen and carbon dioxide in the control of spiracular function in *Cecropia* pupae. *Biol. Bull.* **147**, 274–293.
- Case, J. F. (1956). Carbon dioxide and oxygen effects on the spiracles of flies. *Physiol. Zool.* **29**, 163–171.
- Cavallaro, M. C. and Hoback, W. W. (2014). Hypoxia tolerance of larvae and pupae of the semi-terrestrial caddisfly (Trichoptera: Limnephilidae). *Ann. Entomol. Soc. Am.* **107**, 1081–1085.
- Choi, D. W. (2005). Neurodegeneration: cellular defences destroyed. *Nature* **433**, 696–698.
- Chown, S. L. and Holter, P. (2000). Discontinuous gas exchange cycles in *Aphodius fossor* (Scarabaeidae): a test of hypotheses concerning origins and mechanisms. *J. Exp. Biol.* **203**, 397–403.
- Colinet, H. and Renault, D. (2012). Metabolic effects of CO<sub>2</sub> anaesthesia in *Drosophila melanogaster*. *Biol. Lett.* **8**, 1050–1054.
- Collard, C. D. and Gelman, S. (2001). Pathophysiology, clinical manifestations, and prevention of ischemia-reperfusion injury. *Anesthesiology* **94**, 1133–1138.
- Conradi-Larsen, E. M. and Sømme, L. (1973). Anaerobiosis in the overwintering beetle *Pelophila borealis*. *Nature* **245**, 388–390.
- Contreras, H. L. and Bradley, T. J. (2009). Metabolic rate controls respiratory pattern in insects. *J. Exp. Biol.* **212**, 424–428.
- Contreras, H. L. and Bradley, T. J. (2010). Transitions in insect respiratory patterns are controlled by changes in metabolic rate. *J. Insect Physiol.* **56**, 522–528.
- Contreras, H. L., Heinrich, E. C. and Bradley, T. J. (2014). Hypotheses regarding the discontinuous gas exchange cycle (DGC) of insects. *Curr. Opin. Insect Sci.* **4**, 48–53.
- Denny, M. W. (1993). *Air and Water: The Biology and Physics of Life's Media*. Princeton, NJ: Princeton University Press.
- Doelling, A. R. W., Griffis, N. and Williams, J. B. (2014). Repeated freezing induces oxidative stress and reduces survival in the freeze-tolerant goldenrod gall fly, *Eurosta solidaginis*. *J. Insect Physiol.* **67**, 20–27.
- Förster, T. D. and Hetz, S. K. (2010). Spiracle activity in moth pupae – the role of oxygen and carbon dioxide revisited. *J. Insect Physiol.* **56**, 492–501.
- Greenlee, K. J. and Harrison, J. F. (2005). Respiratory changes throughout ontogeny in the tobacco hornworm caterpillar, *Manduca sexta*. *J. Exp. Biol.* **208**, 1385–1392.
- Greenlee, K. J., Socha, J. J., Eubanks, H. B., Pedersen, P., Lee, W.-K. and Kirkton, S. D. (2013). Hypoxia-induced compression in the tracheal system of the tobacco hornworm caterpillar, *Manduca sexta*. *J. Exp. Biol.* **216**, 2293–2301.
- Grieshaber, B. J. and Terblanche, J. S. (2015). A computational model of insect discontinuous gas exchange: a two-sensor, control systems approach. *J. Theor. Biol.* **374**, 138–151.
- Hahn, D. A. and Denlinger, D. L. (2007). Meeting the energetic demands of insect diapause: nutrient storage and utilization. *J. Insect Physiol.* **53**, 760–773.
- Harrison, J. F. (2001). Insect acid-base physiology. *Annu. Rev. Entomol.* **46**, 221–250.
- Harrison, J. F., Hadley, N. F. and Quinlan, M. C. (1995). Acid-base status and spiracular control during discontinuous ventilation in grasshoppers. *J. Exp. Biol.* **198**, 1755–1763.
- Harrison, J., Frazier, M. R., Henry, J. R., Kaiser, A., Klok, C. J. and Rascón, B. (2006). Responses of terrestrial insects to hypoxia or hyperoxia. *Respir. Physiol. Neurobiol.* **154**, 4–17.
- Harrison, J. F., Waters, J. S., Cease, A. J., Vandenbrooks, J. M., Callier, V., Klok, C. J., Shaffer, K. and Socha, J. J. (2013). How locusts breathe. *Physiology* **28**, 18–27.
- Heinrich, E. and Bradley, T. J. (2014). Temperature-dependent variation in gas exchange patterns and spiracular control in *Rhodnius prolixus*. *J. Exp. Biol.* **217**, 2752–2760.
- Hetz, S. K. and Bradley, T. J. (2005). Insects breathe discontinuously to avoid oxygen toxicity. *Nature* **433**, 516–519.
- Hoback, W. W. and Stanley, D. W. (2001). Insects in hypoxia. *J. Insect Physiol.* **47**, 533–542.
- Hoback, W. W., Stanley, D. W., Higley, L. G. and Barnhart, M. C. (1998). Survival of immersion and anoxia by larval tiger beetles, *Cicindela togata*. *Am. Midl. Nat.* **140**, 27–33.
- Hoback, W. W., Podrabsky, J. E., Higley, L. G., Stanley, D. W. and Hand, S. C. (2000). Anoxia tolerance of con-familial tiger beetle larvae is associated with differences in energy flow and anaerobiosis. *J. Comp. Physiol. B Biochem. Syst. Environ. Physiol.* **170**, 307–314.

- Hochachka, P. W. (1997). Oxygen – a key regulatory metabolite in metabolic defense against hypoxia. *Am. Zool.* **37**, 595–603.
- Hoyle, G. (1960). The action of carbon dioxide gas on an insect spiracular muscle. *J. Insect Physiol.* **4**, 63–79.
- Hunter, M. D. (2001). Out of sight, out of mind: the impacts of root-feeding insects in natural and managed systems. *Agric. For. Entomol.* **3**, 3–9.
- Hutchinson, G. E. (1981). Thoughts on aquatic insects. *Bioscience* **31**, 495–500.
- Joanisse, D. and Storey, K. (1996). Oxidative stress and antioxidants in overwintering larvae of cold-hardy goldenrod gall insects. *J. Exp. Biol.* **199**, 1483–1491.
- Kestler, P. (1985). Respiration and respiratory water loss. In *Environmental Physiology and Biochemistry of Insects* (ed. K. Hoffmann), pp. 137–183. Berlin: Springer.
- Kirkton, S. D., Niska, J. A. and Harrison, J. F. (2005). Ontogenetic effects on aerobic and anaerobic metabolism during jumping in the American locust, *Schistocerca americana*. *J. Exp. Biol.* **208**, 3003–3012.
- Kolesnikov, A. N., Karamyan, F. N. and Hoback, W. W. (2012). Survival of ground beetles (Coleoptera: Carabidae) submerged during floods: field and laboratory studies. *Eur. J. Entomol.* **109**, 71–76.
- Lighton, J. R. B. (1996). Discontinuous gas exchange in insects. *Annu. Rev. Entomol.* **41**, 309–324.
- Lighton, J. R. B. (2008). *Measuring Metabolic Rates*. Oxford: Oxford University Press.
- Lighton, J. R. B. and Schilman, P. E. (2007). Oxygen reperfusion damage in an insect. *PLoS ONE* **2**, e1267.
- Lilly, J. H. (1956). Soil insects and their control. *Annu. Rev. Entomol.* **1**, 203–222.
- Madden, A. H. and Chamberlin, F. S. (1945). *Biology of the tobacco hornworm in the cigar-tobacco district*.
- Matthews, P. G. D. and White, C. R. (2011). Regulation of gas exchange and haemolymph pH in the cockroach *Nauphoeta cinerea*. *J. Exp. Biol.* **214**, 3062–3073.
- Mbata, G. N., Hetz, S. K., Reichmuth, C. and Adler, C. (2000). Tolerance of pupae and pharate adults of *Callosobruchus subinnotatus* Pic (Coleoptera: Bruchidae) to modified atmospheres: a function of metabolic rate. *J. Insect Physiol.* **46**, 145–151.
- Meidell, E.-M. (1983). Diapause, aerobic and anaerobic metabolism in alpine, adult *Melasma collaris* (Coleoptera). *Oikos* **41**, 239–244.
- Nicolas, G. and Sillans, D. (1989). Immediate and latent effects of carbon dioxide on insects. *Annu. Rev. Entomol.* **34**, 97–116.
- Odell, J. P. (1998). Energetics of metamorphosis in two holometabolous insect species: *Manduca sexta* (Lepidoptera: Sphingidae) and *Tenebrio molitor* (Coleoptera: Tenebrionidae). *J. Exp. Zool.* **280**, 344–353.
- Pedersen, O. and Colmer, T. D. (2012). Physical gills prevent drowning of many wetland insects, spiders and plants. *J. Exp. Biol.* **215**, 705–709.
- Seymour, R. S. and Matthews, P. G. D. (2013). Physical gills in diving insects and spiders: theory and experiment. *J. Exp. Biol.* **216**, 164–170.
- Singh, J. S. and Gupta, S. R. (1977). Plant decomposition and soil respiration in terrestrial ecosystems. *Bot. Rev.* **43**, 449–528.
- Sláma, K. (1988). A new look at insect respiration. *Biol. Bull.* **175**, 289.
- Sláma, K. (1999). Active regulation of insect respiration. *Ann. Entomol. Soc. Am.* **92**, 916–929.
- Sprague, J. C. and Woods, H. A. (2015). Costs and benefits of underground pupal chambers constructed by insects: a test using *Manduca sexta*. *Physiol. Biochem. Zool.* **88**, 521–534.
- Storey, K. B. and Storey, J. M. (1990). Metabolic rate depression and biochemical adaptation in anaerobiosis, hibernation and estivation. *Q. Rev. Biol.* **65**, 145–174.
- Thompson, R. J., Zhou, N. and MacVicar, B. A. (2006). Ischemia opens neuronal gap junction hemichannels. *Science* **312**, 924–927.
- Topp, W. and Ring, R. A. (1988). Adaptations of Coleoptera to the marine environment. II. Observations on rove beetles (Staphylinidae) from rocky shores. *Can. J. Zool.* **66**, 2469–2474.
- Tuttle, J. P. (2007). *The Hawk Moths of North America*. Washington, DC: The Wedge Entomological Research Foundation.
- Uvarov, B. (1977). *Grasshoppers and Locusts. A Handbook of General Acridology. Vol. 2. Behaviour, Ecology, Biogeography, Population Dynamics*. London: Centre for Overseas Pest Research.
- Van Voorhies, W. A. (2009). Metabolic function in *Drosophila melanogaster* in response to hypoxia and pure oxygen. *J. Exp. Biol.* **212**, 3132–3141.
- Verberk, W. C. E. P., Bilton, D. T., Calosi, P. and Spicer, J. I. (2011). Oxygen supply in aquatic ectotherms: partial pressure and solubility together explain biodiversity and size patterns. *Ecology* **92**, 1565–1572.
- Wegener, G. (1993). Hypoxia and posthypoxic recovery in insects: physiological and metabolic aspects. In *Surviving Hypoxia: Mechanisms of Control and Adaptation* (ed. P. W. Hochachka, P. L. Lutz, T. Sick, M. Rosenthal and G. van den Thillart), pp. 417–434. Boca Raton, FL: CRC Press.
- Wegener, G. and Moratzky, T. (1995). Hypoxia and anoxia in insects: microcalorimetric studies on two species (*Locusta migratoria* and *Manduca sexta*) showing different degrees of anoxia tolerance. *Thermochim. Acta* **251**, 209–218.
- Westneat, M. W., Betz, O., Blob, R. W., Fezzaa, K., Cooper, W. J. and Lee, W.-K. (2003). Tracheal respiration in insects visualized with synchrotron X-ray imaging. *Science* **299**, 558–560.
- Weyel, W. and Wegener, G. (1996). Adenine nucleotide metabolism during anoxia and postanoxic recovery in insects. *Experientia* **52**, 474–480.
- White, J. and Strehl, C. E. (1978). Xylem feeding by periodical cicada nymphs on tree roots. *Ecol. Entomol.* **3**, 323–327.
- Wigglesworth, V. B. (1935). The regulation of respiration in the flea, *Xenopsylla cheopis*, Roths. (Pulicidae). *Proc. R. Soc. B Biol. Sci.* **118**, 397–419.
- Wobschall, A. and Hetz, S. K. (2004). Oxygen uptake by convection and diffusion in diapausing moth pupae (*Attacus atlas*). *Int. Congr. Ser.* **1275**, 157–164.
- Woods, H. A. (1999). Egg-mass size and cell size: effects of temperature on oxygen distribution. *Am. Zool.* **39**, 244–252.
- Woods, H. A. and Hill, R. I. (2004). Temperature-dependent oxygen limitation in insect eggs. *J. Exp. Biol.* **207**, 2267–2276.
- Woods, H. A. and Lane, S. J. (2016). Data from: Metabolic recovery from drowning by insect pupae. *Dryad Digital Repository*. <http://dx.doi.org/10.5061/dryad.v7fd5>.
- Yocum, G. D. and Denlinger, D. L. (1994). Anoxia blocks thermotolerance and the induction of rapid cold hardening in the flesh fly, *Sarcophaga crassipalpis*. *Physiol. Entomol.* **19**, 152–158.
